# Supplementary material for: Use of a large Stokes-shift fluorophore to increase the multiplexing capacity of a point-of-care DNA diagnostic device
Source: Royal Society of Chemistry journal article supplement (doi:10.1039/c3an00593c), 2013-01-01
Supplement: c3an00593c.pdf [file c3an00593c.pdf]

## Supporting information

### Use of a large Stokes-shift fluorophore to increase the multiplexing capacity of a point-of-care DNA diagnostic device

James A. Richardson<sup>\*a</sup>, Trevor Morgan<sup>b</sup>, Michael Andreou<sup>b</sup> and Tom Brown<sup>a</sup>

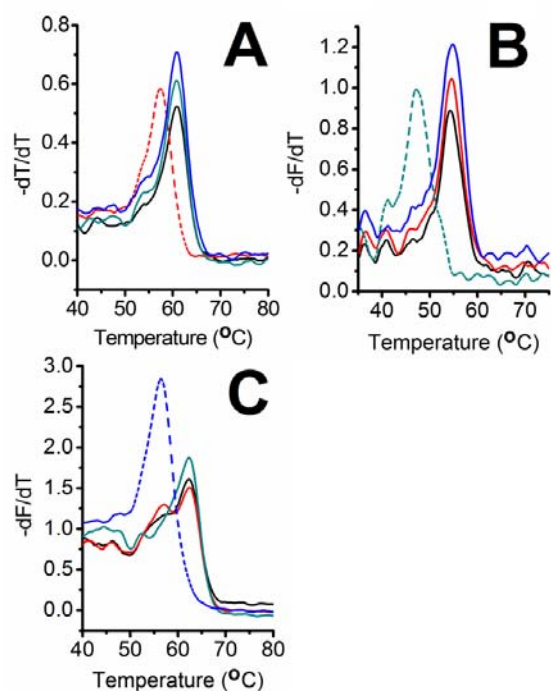

**Figure S1;** Melting curve derivatives of four samples performed on a Rotogene 3000 instrument, one containing wild-type targets for all three probes (Black), and three containing two wild-type and one mutant target, either C524X (Red),  $\Delta$ F508 (Blue) or S466X (Cyan). Three channel combinations were used to analyze each sample, CH1 ex - CH1 em (A), Ch2 ex - CH2 em (B) and CH1 ex - CH2 em (C). Recognition of the mutant sequence by the corresponding probe is shown by dashed lines.

**Table S1;** Melting temperatures ( $^{\circ}$ C) of samples containing three probes with either complementary target sequences, or one of the three available mutations, performed on a Rotogene 3000 instrument.  $T_m$  values of mismatched probes are underlined and mismatch/deletion is in parenthesis. (-TTT = triple T deletion).

| Mutation located at | P-C524X/<br>C524X $T_m$ | P-S466X/<br>S466X $T_m$ | P- $\Delta$ F508/<br>$\Delta$ F508 $T_m$ |
|---------------------|-------------------------|-------------------------|------------------------------------------|
| No mutation         | 60.9                    | 54.5                    | 62.4                                     |
| C524X               | <u>57.4 (AG)</u>        | 54.5                    | 62.5                                     |
| S466X               | 60.8                    | <u>47.4 (GG)</u>        | 62.4                                     |
| $\Delta$ F508       | 60.8                    | 54.6                    | <u>56.5 (-TTT)</u>                       |

**Table S2;** Sequences of target oligonucleotides used for probes in study, mutation sites in bold and underlined.

| Name             | Sequence                                 |
|------------------|------------------------------------------|
| C524X WT         | GTCATCAAAGCATG <u>C</u> CAACTAGAAGAG     |
| C524X MT         | GTCATCAAAGCATG <u>A</u> CAACTAGAAGAG     |
| S466X WT         | GACTT <u>C</u> ACTTCTAATGATGATTATGGGA    |
| S466X MT         | GACTT <u>G</u> ACTTCTAATGATGATTATGGGA    |
| $\Delta$ F508 WT | CACCATTAAAGAAAATATCATC <u>TTT</u> GGTGTT |
| $\Delta$ F508 MT | CACCATTAAAGAAAATATCATCGGTGTT             |

### Deconvoluted ESI<sup>+</sup> mass spectra of probes acquired on Bruker micrOTOF

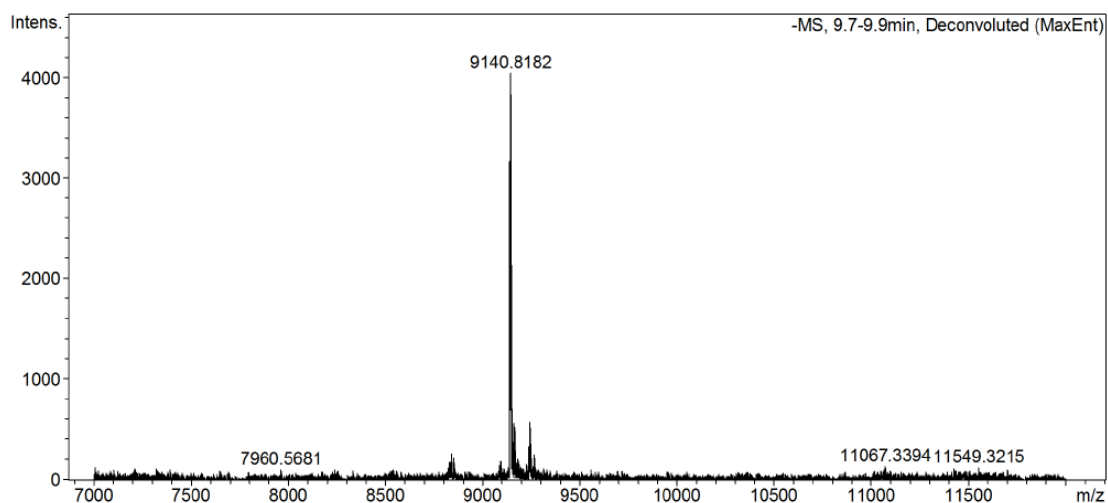

**Figure S2;** probe P- $\Delta$ F508. Found 9141, requires 9142.

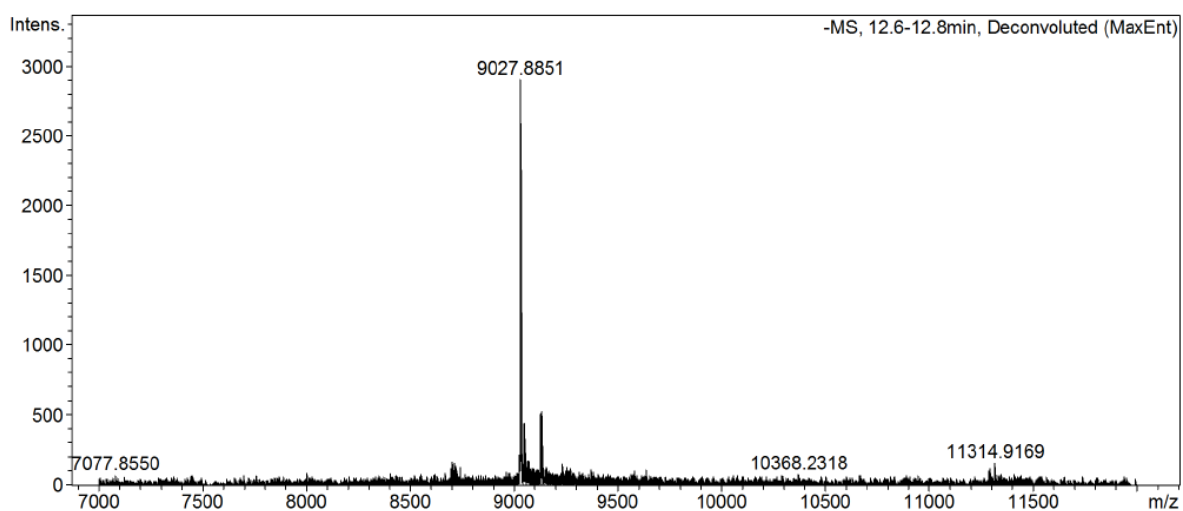

**Figure S3;** probe P-S466X. Found 9028, requires 9030.

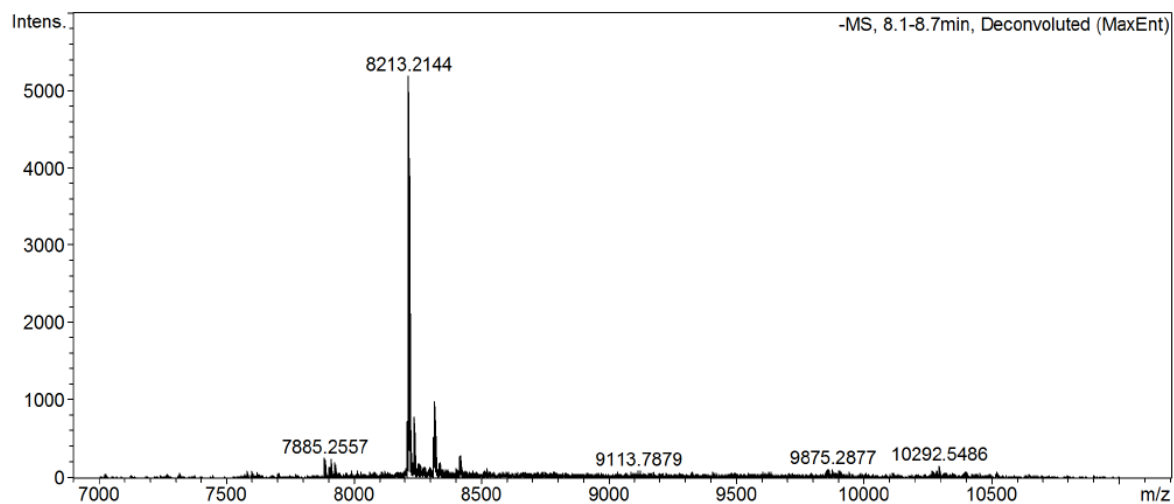

**Figure S4;** probe P-C524X. Found 8213, requires 8214.
